# Supplementary material
Source: PubMed Central journal article supplement (PMC10105368)
Supplement: NIHMS1883495-supplement-4.pdf [file NIHMS1883495-supplement-4.pdf]

**Supplementary Table 1.** Fluorochrome-conjugated antibodies source.

| <b>Antibody Specificity</b>                     | <b>Format</b> | <b>Clone</b>  | <b>Source</b>   | <b>Catalog Number</b>   |
|-------------------------------------------------|---------------|---------------|-----------------|-------------------------|
| <b>Roswell Park Comprehensive Cancer Center</b> |               |               |                 |                         |
| CD138                                           | BV421         | MI15          | BD Biosciences  | 562935                  |
| CD27                                            | BV510         | O323          | BioLegend       | 302835                  |
| CD38                                            | FITC          | T16           | Beckman Coulter | IM0775U                 |
| CD56                                            | PE            | C5.9          | Cytognos        | CYT-56PE                |
| CD45                                            | PerCP-Cy5.5   | H130          | BioLegend       | 304028                  |
| CD19                                            | PECy7         | J3-119        | Beckman Coulter | IM3628U                 |
| CD117                                           | APC           | 104D2         | BD Biosciences  | 341106                  |
| CD81                                            | APCH7         | JS-81         | BD Biosciences  | 656154                  |
| cKappa                                          | APC           | Polyclonal    | Dako            | C0222                   |
| cLambda                                         | APC-C750      | Polyclonal    | Cytognos        | CYT-LAC750              |
| <b>Mayo Clinic</b>                              |               |               |                 |                         |
| CD138                                           | BV421         | MI15          | BD Biosciences  | 630005 <sup>a</sup>     |
| CD27                                            | BV510         | O323          | BioLegend       | 302835                  |
| CD38 (Multiepitope)                             | FITC          | Multi-epitope | Cytognos        | CYT-MM-MRD <sup>b</sup> |
| CD56                                            | PE            | C5.9          | Cytognos        | CYT-MM-MRD <sup>b</sup> |
| CD45                                            | PerCP-Cy5.5   | EO1           | Cytognos        | CYT-MM-MRD <sup>b</sup> |
| CD19                                            | PECy7         | SA287         | Cytognos        | CYT-MM-MRD <sup>b</sup> |
| CD117                                           | APC           | 104D2         | Cytognos        | CYT-MM-MRD <sup>b</sup> |
| CD81                                            | APC-C750      | M38           | Cytognos        | CYT-MM-MRD <sup>b</sup> |
| cKappa                                          | APC           | Polyclonal    | Cytognos        | CYT-MM-MRD <sup>b</sup> |
| cLambda                                         | APC-C750      | Polyclonal    | Cytognos        | CYT-MM-MRD <sup>b</sup> |

<sup>a</sup> Customized reagent identical to item #562935 except for larger reagent size; may not be found on manufacturer's website

<sup>b</sup> Items sold as lyophilized product in a kit

**Supplementary Table 2.** Interpretation of patient samples before and after adopting consensus gating and MRD levels.

| Sample      | Stage 1      |                              | Stage 2      |                              |
|-------------|--------------|------------------------------|--------------|------------------------------|
|             | Agreeability | MRD Level, % (Mean $\pm$ SD) | Agreeability | MRD Level, % (Mean $\pm$ SD) |
| <b>MRD+</b> |              |                              |              |                              |
| #1          | 100          | 0.0063 $\pm$ 0.0026          | 100          | 0.0066 $\pm$ 0.0023          |
| #2          | 100          | 0.0096 $\pm$ 0.0033          | 100          | 0.0084 $\pm$ 0.0028          |
| #4          | 88.24        | 0.0019 $\pm$ 0.0010          | 70.59        | 0.0015 $\pm$ 0.0007          |
| #5          | 64.71        | 0.0011 $\pm$ 0.0007          | 64.71        | 0.0010 $\pm$ 0.0006          |
| #6          | 94.12        | 0.0660 $\pm$ 0.0247          | 94.12        | 0.0559 $\pm$ 0.0239          |
| #7          | 88.24        | 0.1117 $\pm$ 0.0548          | 94.12        |                              |
| Mean, %     | 89.22        |                              | 87.25        |                              |
| SD, %       | 13.11        |                              | 15.53        |                              |
| <b>MRD-</b> |              |                              |              |                              |
| #3          | 70.59        | 0.0034 $\pm$ 0.0077          | 82.35        | 0.0027 $\pm$ 0.0075          |
| #8          | 64.71        | 0.0019 $\pm$ 0.0031          | 76.47        | 0.0007 $\pm$ 0.0013          |
| Mean, %     | 67.65        |                              | 79.41        |                              |
| SD, %       | 4.16         |                              | 4.16         |                              |

836

837

838

839

**Supplementary Table 3:** Immunophenotypic profile of myeloma cells.

| <b>Samples</b>                    | <b>CD38</b> | <b>CD138</b> | <b>CD19</b> | <b>CD45</b> | <b>CD56</b> | <b>CD117</b> | <b>CD81</b> | <b>CD27</b> | <b>cKappa</b> | <b>cLambda</b> |
|-----------------------------------|-------------|--------------|-------------|-------------|-------------|--------------|-------------|-------------|---------------|----------------|
| <b>Stages 1 and 2<sup>a</sup></b> |             |              |             |             |             |              |             |             |               |                |
| <b>#1</b>                         | +           | +            | -           | -           | +           | dim          | -           | dim         | +             | -              |
| <b>#2</b>                         | +           | +            | -           | dim         | +           | het          | -           | dim         | +             | -              |
| <b>#4</b>                         | +           | +            | -           | -           | het         | -            | -           | dim         | -             | -              |
| <b>#5</b>                         | dim         | +            | -           | -           | dim         | -            | -           | dim         | +             | -              |
| <b>#6</b>                         | dim         | +            | -           | dim         | -           | +            | dim         | dim         | +             | -              |
| <b>#7</b>                         | dim         | +            | -           | dim         | +           | -            | -           | het         | +             | -              |
| <b>Stage 3<sup>b</sup></b>        |             |              |             |             |             |              |             |             |               |                |
| <b>#1</b>                         | dim         | +            | -           | dim         | br          | +            | -           | dim         | +             | -              |
| <b>#3</b>                         | +           | +            | -           | dim         | +           | +            | het         | dim         | +             | -              |
| <b>#6</b>                         | +           | +            | -           | +           | +           | +            | -           | dim         | -             | +              |
| <b>#7</b>                         | dim         | +            | -           | dim         | het         | +            | +           | dim         | +             | -              |
| <b>#10</b>                        | dim         | +            | -           | dim         | het         | het          | dim         | dim         | +             | -              |

<sup>a</sup> Samples 3 and 8 were considered as MM MRD negative

<sup>b</sup> Samples 2, 4, 5, 8 and 9 were considered as MM MRD negative

**Supplementary Table 4.** Variation in the measurement of MM MRD related parameters between participants using consensus analysis method (Stage 2).

| Sample No.                              | #1        | #2           | #3*           | #4          | #5            | #6          | #7            | #8*          | Mean CV       |
|-----------------------------------------|-----------|--------------|---------------|-------------|---------------|-------------|---------------|--------------|---------------|
| <b>Total Cells Analyzed</b>             |           |              |               |             |               |             |               |              |               |
| Mean                                    | 8,149,491 | 8,157,372    | 2,628,127     | 8,892,494   | 8,826,923     | 9,420,484   | 9,320,259     | 5,425,946    |               |
| SD                                      | 531,537   | 634,388      | 75,603        | 205,399     | 549,253       | 662,481     | 229,831       | 185,864      |               |
| CV, %                                   | 6.52      | <b>7.78</b>  | 2.88          | <b>2.31</b> | 6.22          | 7.03        | 2.47          | 3.43         | <b>4.83</b>   |
| <b>Total Normal PCs</b>                 |           |              |               |             |               |             |               |              |               |
| Mean                                    | 2,433     | 367          | 1,172         | 304         | 3,213         | 7,813       | 660           | 436          |               |
| SD                                      | 907       | 171          | 393           | 151         | 1491          | 2294        | 1,032         | 98           |               |
| CV, %                                   | 37.3      | 46.53        | 33.5          | 49.65       | 46.41         | 29.36       | <b>156.42</b> | <b>22.38</b> | <b>52.694</b> |
| <b>Total Abnormal PCs</b>               |           |              |               |             |               |             |               |              |               |
| Mean                                    | 536       | 681          | 70            | 130         | 91            | 5,215       | 7,086         | 39           |               |
| SD                                      | 180       | 219          | 195           | 62          | 53            | 2,207       | 5,299         | 72           |               |
| CV, %                                   | 33.5      | <b>32.12</b> | <b>279.09</b> | 47.52       | 57.77         | 42.33       | 74.77         | 186.74       | <b>94.23</b>  |
| <b>MRD Level, %</b>                     |           |              |               |             |               |             |               |              |               |
| Mean                                    | 0.00662   | 0.0084       | 0.00266       | 0.00146     | 0.00104       | 0.05589     | 0.0769        | 0.00071      |               |
| SD                                      | 0.00226   | 0.00279      | 0.00748       | 0.0007      | 0.00061       | 0.02385     | 0.05766       | 0.00134      |               |
| CV, %                                   | 34.14     | <b>33.22</b> | <b>280.6</b>  | 47.48       | 58.01         | 42.67       | 74.99         | 187.7        | <b>94.851</b> |
| <b>Limit of Detection, %</b>            |           |              |               |             |               |             |               |              |               |
| Mean                                    | 0.00025   | 0.00025      | 0.00076       | 0.00023     | 0.00023       | 0.00022     | 0.00022       | 0.00037      |               |
| SD                                      | 0.00002   | 0.00002      | 0.00002       | 0.00001     | 0.00001       | 0.00002     | 0.00001       | 0.00001      |               |
| CV, %                                   | 6.6       | <b>8.01</b>  | 3.05          | <b>2.77</b> | 6.12          | 7.72        | 3.4           | 3.38         | <b>5.1313</b> |
| <b>Lower Limit of Quantification, %</b> |           |              |               |             |               |             |               |              |               |
| Mean                                    | 0.00123   | 0.00119      | 0.00358       | 0           | 0.00113       | 0.00112     | 0.00099       | 0.00109      |               |
| SD                                      | 0.00008   | 0.0001       | 0.00012       | 0           | 0.00003       | 0.00009     | 0.0001        | 0.00004      |               |
| CV, %                                   | 6.64      | 8.81         | 3.47          | <b>2.51</b> | 8.33          | <b>9.92</b> | 3.26          | 4.01         | <b>5.8688</b> |
| <b>Total Mast Cells</b>                 |           |              |               |             |               |             |               |              |               |
| Mean                                    | 79        | 87           | 18            | 63          | 199           | 252         | 172           | 38           |               |
| SD                                      | 22        | 45           | 11            | 34          | 37            | 51          | 104           | 35           |               |
| CV, %                                   | 27.51     | 52.04        | 63.68         | 54.02       | <b>18.5</b>   | 20.26       | 60.44         | <b>92.04</b> | <b>48.561</b> |
| <b>Total Hematogones</b>                |           |              |               |             |               |             |               |              |               |
| Mean                                    | 263       | 784          | 8,918         | 4,448       | 168           | 253,159     | 1,447         | 16,173       |               |
| SD                                      | 51        | 121          | 3,339         | 916         | 310           | 69,565      | 1,803         | 2,688        |               |
| CV, %                                   | 19.35     | <b>15.37</b> | 37.44         | 20.59       | <b>184.44</b> | 27.48       | 124.64        | 16.62        | <b>55.741</b> |

\*Samples considered to be MRD-negative

Bold values represent maximum, minimum, and mean CVs

**Supplementary Table 5.** Variation in the measurement of MM MRD related parameters between participants using consensus analysis method (Stage 3)

| Sample No.                              | #1*       | #2*       | #3*         | #4*          | #5*           | #6        | #7           | #8           | #9        | #10     | Mean CV       |
|-----------------------------------------|-----------|-----------|-------------|--------------|---------------|-----------|--------------|--------------|-----------|---------|---------------|
| <b>Total Cells Analyzed</b>             |           |           |             |              |               |           |              |              |           |         |               |
| Mean                                    | 8,673,870 | 6,924,800 | 8,669,318   | 8,217,839    | 8,508,059     | 7,883,203 | 8,694,735    | 9,210,348    | 8,605,036 | 7597720 |               |
| SD                                      | 470,247   | 480,566   | 159,688     | 761,248      | 261,122       | 596,793   | 282,205      | 283,418      | 389,262   | 368,096 |               |
| CV, %                                   | 5.42      | 6.94      | <b>1.84</b> | <b>9.26</b>  | 3.07          | 7.57      | 3.25         | 3.08         | 4.52      | 4.84    | <b>4.979</b>  |
| <b>Total Normal PCs</b>                 |           |           |             |              |               |           |              |              |           |         |               |
| Mean                                    | 6,399     | 18779     | 1,060       | 3473         | 5,180         | 66,028    | 2125         | 2189         | 1560      | 638     |               |
| SD                                      | 1,301     | 3811      | 228         | 1159         | 1305          | 15981     | 283          | 415          | 249       | 175     |               |
| CV, %                                   | 20.33     | 20.29     | 21.49       | <b>33.37</b> | 25.19         | 24.2      | <b>13.34</b> | 18.95        | 15.94     | 27.44   | <b>22.05</b>  |
| <b>Total Abnormal PCs</b>               |           |           |             |              |               |           |              |              |           |         |               |
| Mean                                    | 4         | 780       | 22          | 5            | 222           | 111       | 169          | 184          | 208       | 66      |               |
| SD                                      | 7         | 1918      | 41          | 9            | 552           | 67        | 96           | 64           | 67        | 34      |               |
| CV, %                                   | 179.67    | 245.85    | 185.17      | 166.01       | <b>249.07</b> | 60.33     | 56.78        | <b>35.03</b> | 32.09     | 52.16   | <b>126.22</b> |
| <b>MRD Level, %</b>                     |           |           |             |              |               |           |              |              |           |         |               |
| Mean                                    | 0.00002   | 0.00485   | 0.00023     | 0.00005      | 0.00024       | 0.00130   | 0.00179      | 0.00203      | 0.00251   | 0.00086 |               |
| SD                                      | 0.00006   | 0.01268   | 0.00048     | 0.00008      | 0.00082       | 0.00072   | 0.00091      | 0.0007       | 0.00058   | 0.00045 |               |
| CV, %                                   | 280.31    | 261.35    | 211.23      | 178.67       | <b>339.44</b> | 55.7      | 50.52        | <b>34.8</b>  | 22.94     | 52.69   | <b>148.77</b> |
| <b>Limit of Detection, %</b>            |           |           |             |              |               |           |              |              |           |         |               |
| Mean                                    | 0.00023   | 0.00029   | 0.00023     | 0.00025      | 0.00024       | 0.00025   | 0.00023      | 0.00022      | 0.00023   | 0.00026 |               |
| SD                                      | 0.00001   | 0.00002   | 0           | 0.00002      | 0.00001       | 0.00002   | 0.00001      | 0.00001      | 0.00001   | 0.00001 |               |
| CV, %                                   | 5.9       | 7.52      | <b>1.86</b> | <b>8.54</b>  | 2.62          | 8.23      | 3.26         | 3.46         | 4.44      | 4.45    | <b>5.028</b>  |
| <b>Lower Limit of Quantification, %</b> |           |           |             |              |               |           |              |              |           |         |               |
| Mean                                    | 0.00058   | 0.00073   | 0.00073     | 0.00058      | 0.00061       | 0.00064   | 0.00057      | 0.00058      | 0.00054   | 0.00059 |               |
| SD                                      | 0.00003   | 0.00005   | 0.00005     | 0.00003      | 0.00005       | 0.00005   | 0.00002      | 0.00001      | 0.00002   | 0.00002 |               |

|                          |              |        |             |              |        |       |        |              |         |       |              |
|--------------------------|--------------|--------|-------------|--------------|--------|-------|--------|--------------|---------|-------|--------------|
| CV, %                    | 5.12         | 7.31   | <b>1.71</b> | <b>8.63</b>  | 3.08   | 8.1   | 3.49   | 3.11         | 4.32    | 4.52  | <b>4.939</b> |
| <b>Total Mast Cells</b>  |              |        |             |              |        |       |        |              |         |       |              |
| Mean                     | 99           | 584    | 1062        | 37           | 171    | 962   | 121    | 415          | 150     | 171   |              |
| SD                       | 29           | 137    | 52          | 25           | 37     | 103   | 80     | 70           | 34      | 102   |              |
| CV, %                    | 29.51        | 23.39  | <b>4.88</b> | <b>67.07</b> | 21.72  | 10.69 | 66.48  | 16.89        | 22.86   | 59.61 | <b>32.31</b> |
| <b>Total Hematogones</b> |              |        |             |              |        |       |        |              |         |       |              |
| Mean                     | 126,475      | 88,101 | 197,742     | 2,142        | 53,248 | 9,102 | 53,524 | 75,366       | 109,679 | 3,026 |              |
| SD                       | 56,642       | 30,287 | 39,680      | 799          | 11,844 | 2,627 | 16,507 | 8,467        | 25,735  | 852   |              |
| CV, %                    | <b>44.79</b> | 34.38  | 20.07       | 37.3         | 22.24  | 28.87 | 30.84  | <b>11.23</b> | 23.46   | 28.15 | <b>28.13</b> |

\*Samples considered to be MRD-negative

Bold values represent maximum, minimum, and mean CVs

842

843

844
